# Supplementary material
Source: publisher site journal article supplement (https://www.dovepress.com/get_supplementary_file.php?f=307784.docx)
Supplement: Supplementary file 1 [file get_supplementary_file.php]

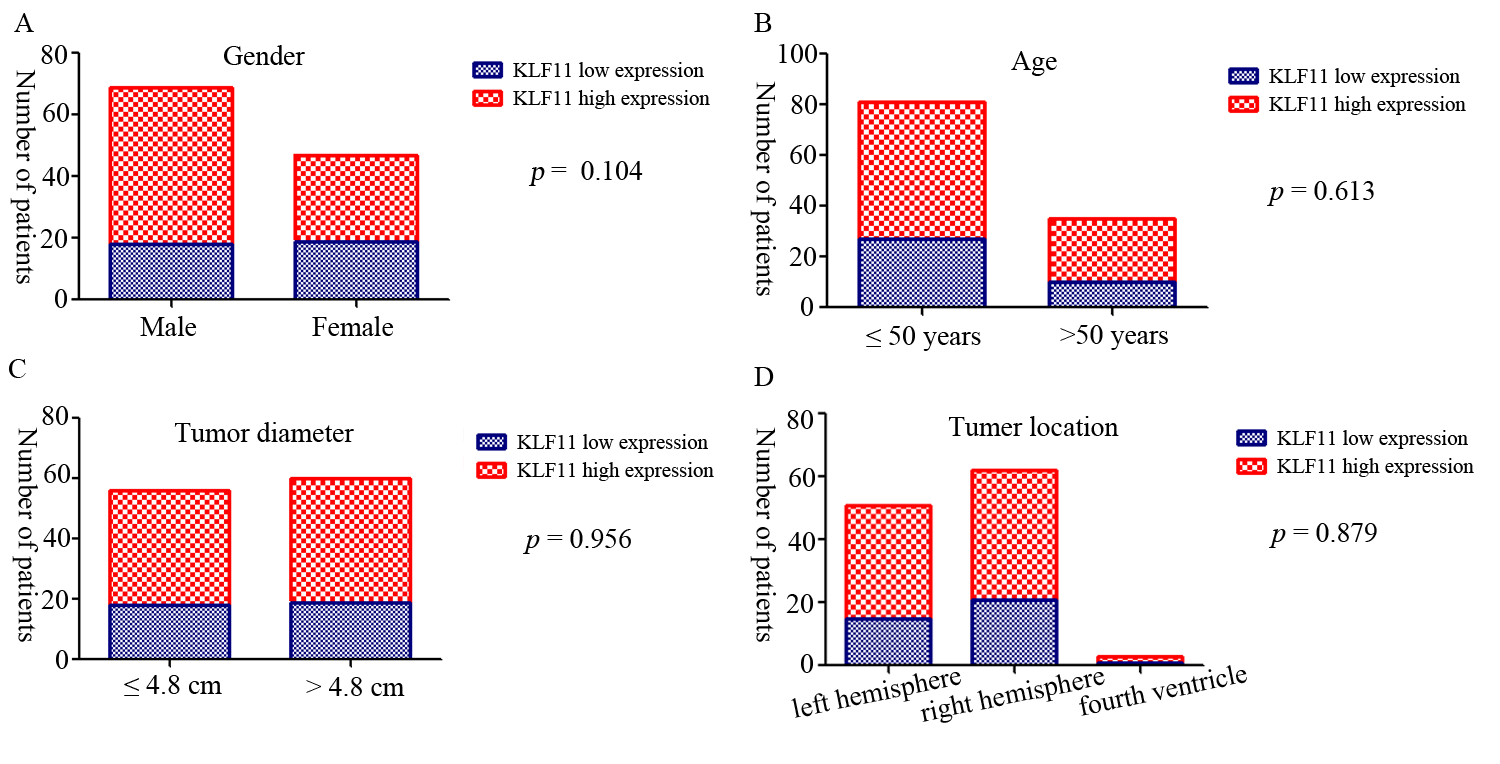


Supplementary Figure 1：The illustration shows that there was no significant differences in (A) gender, (B) age, (C) tumor diameter, and (D) tumor location between the high and low KLF11 expression groups.
